## TITLE PAGE

# Association between Intraoperative End-Tidal Carbon Dioxide and Postoperative Organ Dysfunction in Major Abdominal Surgery: A Retrospective Cohort Study

### Authors' Information:

Li Dong, M.D.,Ph.D.<sup>1,2,3\*</sup>, Chikashi Takeda, M.D.,Ph.D.<sup>2</sup>, Tsukasa Kamitani, P.T.,Dr.P.H.<sup>1</sup>,  
Miho Hamada, M.D.<sup>2</sup>, Akiko Hirotsu, M.D.,Ph.D.<sup>2</sup>, Yosuke Yamamoto, M.D.,Ph.D.<sup>1</sup>, Toshiyuki  
Mizota, M.D.,Ph.D.<sup>2</sup>

<sup>1</sup>Department of Healthcare Epidemiology, Graduate School of Medicine and Public Health,  
Kyoto University, Japan

<sup>2</sup>Department of Anesthesia, Kyoto University Hospital, Kyoto, Japan

<sup>3</sup>Anesthesia Associates of Kobe, Kobe, Japan

### Correspondence Author:

Li Dong, M.D.

Department of Anaesthesia, Kyoto University Hospital, 54 Shogoin-Kawahara-cho, Kyoto 606-  
8507, JAPAN

Tel: +81-75-751-3433

E-mail: [dongli@kuhp.kyoto-u.ac.jp](mailto:dongli@kuhp.kyoto-u.ac.jp)

**Running Title:** Intraoperative low EtCO<sub>2</sub> and organ dysfunction

**Abstract:**

**Background:** Data on the effects of intraoperative end-tidal carbon dioxide (EtCO<sub>2</sub>) levels on postoperative organ dysfunction are limited. Thus, this study was designed to investigate the relationship between the intraoperative EtCO<sub>2</sub> level and postoperative organ dysfunction in patients who underwent major abdominal surgery under general anesthesia.

**Methods:** We conducted a retrospective cohort study involving patients who underwent major abdominal surgery under general anesthesia at Kyoto University Hospital. We classified those with a mean EtCO<sub>2</sub> of less than 35 mmHg as low EtCO<sub>2</sub>. The time effect was determined as the minutes when the EtCO<sub>2</sub> value was below 35 mmHg, whereas the cumulative effect was evaluated by measuring the area below the 35-mmHg threshold. The outcome was postoperative organ dysfunction, defined as a composite of at least one organ dysfunction among acute renal injury, circulatory dysfunction, respiratory dysfunction, coagulation dysfunction, and liver dysfunction within 7 days after surgery.

**Results:** Of the 4,171 patients, 1,195 (28%) had low EtCO<sub>2</sub>, and 1,428 (34%) had postoperative organ dysfunction. An association was found between low EtCO<sub>2</sub> and increased postoperative organ dysfunction (adjusted risk ratio, 1.11; 95% confidence interval [CI], 1.03–1.20;  $p = 0.006$ ). Additionally, long-term exposure to EtCO<sub>2</sub> values of less than 35 mmHg ( $\geq 224$  min) was associated with postoperative organ dysfunction (adjusted risk ratio, 1.18; 95% CI, 1.06–1.32;  $p = 0.003$ ) and low EtCO<sub>2</sub> severity (area under the threshold) (adjusted risk ratio, 1.13; 95% CI, 1.02–1.26;  $p = 0.018$ ).

**Conclusions:** Intraoperative low EtCO<sub>2</sub> of below 35 mmHg was associated with increased postoperative organ dysfunction.

**Key Points:** end-tidal carbon dioxide, major abdominal surgery, organ dysfunction, organ perfusion, postoperative outcome

## Text

### Introduction:

Although high-risk surgeries account for only 12.5% of all surgical procedures, they account for more than 80% of surgery-related deaths[1]. Intraoperative organ hypoperfusion is a cause of poor outcomes and may lead to high postoperative mortality[2]. Therefore, markers that can be used to monitor intraoperative organ hypoperfusion and predict postoperative organ injury are essential to improve postoperative outcomes.

The International Standards for a Safe Practice of Anesthesia recommend monitoring end-tidal carbon dioxide (EtCO<sub>2</sub>) using a capnograph during general anesthesia[3]. As EtCO<sub>2</sub> involves all four components of respiration and circulation (i.e., ventilation, diffusion, circulation, and metabolism), it provides an excellent picture of the respiratory and circulatory processes. Under conditions of constant ventilation, EtCO<sub>2</sub> can be used to monitor cardiac output and pulmonary blood flow[4][5]. In fact, several studies have shown that EtCO<sub>2</sub> is useful in predicting the effectiveness of resuscitation[6] and outcomes in patients with cardiopulmonary arrest (CPA)[7][8] and in predicting cardiac output when the patient is weaned from cardiopulmonary bypass (CPB)<sup>[9],[10]</sup>. Similarly, EtCO<sub>2</sub> in noncardiac surgery was associated with increased postoperative mortality[11] and prolonged postoperative length of hospital stay[11-13]. However, the association between EtCO<sub>2</sub> and postoperative organ dysfunction in patients undergoing general surgical treatments has not yet been fully evaluated. Therefore, we investigated the association between intraoperative EtCO<sub>2</sub> and postoperative organ dysfunction in patients undergoing major abdominal surgery.

## **Methods**

### **Study design, setting, and population**

In this single-center retrospective cohort study, we used data from the IMPROVE Anesthesia Care and Outcomes (Kyoto-IMPACT) database of Kyoto University Hospital. The Kyoto-IMPACT database aims to clarify the relationship between intraoperative respiratory and cardiovascular parameters and postoperative outcomes. We continuously selected patients who underwent surgery under the care of anesthesiologists at Kyoto University Hospital (1,121 beds). Several studies have been published using the Kyoto-IMPACT database [14][15]. We included consecutive patients aged 18 years or older who underwent major abdominal surgery under general anesthesia at Kyoto University Hospital between March 2008 and December 2017. We included individuals who underwent abdominal surgery because major abdominal surgeries involve many cases, a long duration of surgery, and a high rate of postoperative organ dysfunction as outcomes. Major abdominal surgeries included laparoscopic or non-laparoscopic resections of the liver, colon, stomach, pancreas, and esophagus. The exclusion criteria were as follows: (1) patients with missing intraoperative EtCO<sub>2</sub> data; (2) second or subsequent surgery in patients who had undergone multiple surgeries; (3) patients undergoing urological surgery, such as urinary tract unblocking, nephrectomy, and renal transplantation; (4) patients undergoing renal replacement therapy for end-stage renal disease (estimated glomerular filtration rate of < 15 ml.min<sup>-1</sup>.1.73 m<sup>2-1</sup>); (5) patients with a preoperative platelet count of less than 100 × 10<sup>3</sup> cells.μl<sup>-1</sup>; and (6) patients with a preoperative total bilirubin of more than or equal to 2.0 mg.dl<sup>-1</sup>.

### **Ethics**

The Certified Review Board of Kyoto University( Yoshida-Konoe-cho, Sakyo-ku, Kyoto 606-8501, Japan ,Chairperson Prof. Shinji Kosugi) approved the study protocol (approval number:

R1272-3; January 23, 2020) and waived the requirement for informed consent because of the retrospective nature of the study.

### **Data collection**

We collected data from the Kyoto-IMPACT database using the anesthesia information management system and the electronic medical record system. EtCO<sub>2</sub> was measured continuously using a sidestream gas analyzer (GF-220R Multigas/Flow Unit, Nihon Kohden®, Japan), which was uploaded automatically to the anesthesia information management system every 60 s. We defined intraoperative EtCO<sub>2</sub> as the mean EtCO<sub>2</sub> level from skin incision to skin closure. EtCO<sub>2</sub> levels of less than 20 mmHg were removed as artifacts (EtCO<sub>2</sub> during aspiration or position change). Definitions of variables, including the minimum and maximum EtCO<sub>2</sub> values, can be found in S1 Table. We collected data on patients' postoperative course (e.g., acute renal injury [AKI], circulatory dysfunction, respiratory dysfunction, coagulation dysfunction, and liver dysfunction within 7 days postoperatively) from all clinical data contained in the electronic medical records. Ventilator data can be found in S8 Table.

### **Exposure**

To determine how the EtCO<sub>2</sub> level affects postoperative organ dysfunction, exposure was defined by calculating the dose, time, and cumulative effects of EtCO<sub>2</sub>. Dose effects were assessed using the mean EtCO<sub>2</sub>; patients were divided into two groups based on the cutoff level of 35 mmHg proposed by Way and Hill[16]. We defined low EtCO<sub>2</sub> patients as those with a mean EtCO<sub>2</sub> of less than 35 mmHg, whereas we defined normal EtCO<sub>2</sub> patients as those with a mean EtCO<sub>2</sub> of more than or equal to 35 mmHg. The classification into one of these groups was used as the primary exposure for further analysis. Besides, we considered that the relationship between EtCO<sub>2</sub> and postoperative organ dysfunction may not be linear; thus, mean EtCO<sub>2</sub> values

were classified into quartiles (i.e., <35, 35–37, 37–39, and  $\geq 39$  mmHg). To assess the effects of the duration and severity of low EtCO<sub>2</sub> exposure, time effects were determined as the minutes when EtCO<sub>2</sub> values were below 35 mmHg, and cumulative effects were assessed by measuring the area under the threshold of 35 mmHg for each patient. Additionally, we classified minutes and area under the EtCO<sub>2</sub> 35-mmHg threshold into quartiles, using the lowest quartile as the reference category.

### **Outcomes**

Referring to a previous study[17], the primary outcome was a composite of at least one organ dysfunction among AKI (postoperative serum creatinine [SCr] levels increased more than 0.3 mg.dl<sup>-1</sup> or 1.5 times more than preoperative SCr levels, defined by the Kidney Disease: Improving Global Outcome Acute Kidney Injury Work Group)[18], circulatory dysfunction (use of norepinephrine, epinephrine, and vasopressin and the administration of dopamine  $\geq 5$   $\mu\text{g}\cdot\text{kg}^{-1}\cdot\text{min}^{-1}$  and phenylephrine  $\geq 50$   $\mu\text{g}\cdot\text{min}^{-1}$ ), respiratory dysfunction (the need for invasive ventilation by endotracheal intubation or tracheostomy beyond 24 h postoperatively; does not include continuous positive airway pressure or noninvasive ventilation or scheduled reintubation, such as extubation within 24 h after reoperation), coagulation dysfunction (platelet count of  $< 100 \times 10^3$  cells. $\mu\text{l}^{-1}$ , i.e., a Sequential Organ Failure Assessment [SOFA] score of  $\geq 2$  points in the coagulation component)[19], and liver dysfunction (total bilirubin of  $\geq 2.0$  mg.dl<sup>-1</sup>, i.e., a SOFA score of  $\geq 2$  points in the liver component) 7 days after surgery [19]. Secondary outcomes were individual components of the primary composite outcome.

### **Statistical analyses**

We planned to analyze the relationship between intraoperative EtCO<sub>2</sub> and postoperative organ dysfunction before data collection. Continuous variables were expressed as the median and

interquartile range (IQR), and categorical variables were expressed as counts and percentages (%).

First, we performed multivariate Poisson regression with robust variance estimate[20] to calculate the risk ratios for low EtCO<sub>2</sub> (mean EtCO<sub>2</sub> of < 35 mmHg) and postoperative organ dysfunction, using the normal EtCO<sub>2</sub> (mean EtCO<sub>2</sub> of ≥ 35 mmHg) as the reference category. Additionally, the risk ratios for the mean EtCO<sub>2</sub> of the first quartile (mean EtCO<sub>2</sub> of < 35 mmHg), third quartile (mean EtCO<sub>2</sub> of 37–39 mmHg), and fourth quartile (mean EtCO<sub>2</sub> of ≥39 mmHg) were calculated using the second quartile (mean EtCO<sub>2</sub> of 35–37 mmHg) as the reference category because it is considered normocapnia. Furthermore, to examine the time and cumulative effects, we evaluated how each quartile affected postoperative organ dysfunction, with the first quartile of minutes under an EtCO<sub>2</sub> of 35 mmHg and the area below the threshold EtCO<sub>2</sub> of 35 mmHg as reference categories.

To demonstrate the relationship between intraoperative EtCO<sub>2</sub> and postoperative organ dysfunction, we created four models using potential confounding factors that may be associated with the outcomes as follows. Model 1 included the covariates used for models 2, 3, and 4 and biologically and clinically essential data, including the body mass index, American Society of Anesthesiologists physical status (ASAPS), laparoscopic surgery, type of surgery, epidural anesthesia, and mean arterial pressure. In model 2, the covariates included in the AKI risk index were adjusted for age equal to or older than 56 years, male sex, emergency surgery, diabetes mellitus, active congestive heart failure, ascites, hypertension, and renal insufficiency[21]. In model 3, the covariates included in the Revised Cardiac Risk Index (RCRI) were adjusted for emergency surgery, surgery duration longer than 4 h, ischemic heart disease, congestive heart failure, cerebrovascular disease, diabetes, and perioperative SCr of more than 2.0 mg.dl<sup>-1</sup>[22]. In



model 4, the covariates included in the postoperative respiratory failure risk index (RFRI) were adjusted for age, emergency surgery, albumin level of less than 30 g.l<sup>-1</sup>, blood urea nitrogen level of more than or equal to 30 mg.dl<sup>-1</sup>, and chronic obstructive pulmonary disease (COPD)[23], except for partially or fully dependent status because of missing data. Additionally, we adjusted for the aforementioned multivariate regression models to investigate whether the dose, time, or cumulative effects of EtCO<sub>2</sub> affected the secondary outcomes.

The categories of EtCO<sub>2</sub> were treated as continuous variables, and the mean, minutes, and area under the threshold of categories were substituted into the multivariate Poisson regression model, with the median of each group as independent variables. A test of the linear trend was performed between the categories of EtCO<sub>2</sub> and postoperative organ dysfunction, adjusted using the aforementioned model 1 (P for trend).

We performed a sensitivity analysis to assess the robustness of our findings. To assess the plausibility of the primary analysis, we performed a multivariate analysis using the sensitivity model described above as model 1: (i) patients for whom arterial gases were measured during surgery (ii) patients for whom minute ventilation data were available. For patients with intraoperative arterial gas measurements, the arterial partial pressure of carbon dioxide (PaCO<sub>2</sub>)-EtCO<sub>2</sub> gradient was added to the covariates in model 1, defined as model 5, to investigate the relationship between intraoperative EtCO<sub>2</sub> and postoperative organ dysfunction. Finally, for patients for whom minute ventilation data were available, median minute ventilation was added to the covariates in model 1, defined as model 6 and multivariate analysis was performed.

To maximize statistical power, all eligible patients in the Kyoto-IMPACT database were included in the analyses. To determine the statistical power, we predicted 4,500 eligible surgeries in our database in the 9 years, a risk ratio of 1.5 with postoperative organ dysfunction of

30%[17] and low EtCO<sub>2</sub> proportion of 50%[24], resulting in an estimated power of 100%. We conducted complete case analysis because the percentage of missing data was 0.12%. All statistical tests were two-tailed. In all statistical analyses, Stata/SE 15.1 (StataCorp LLC, College Station, TX, USA) was used.

## Results

### Baseline patient characteristics

Among the 4,781 patients who underwent major abdominal surgeries between 2008 and 2017, 4,772 met the inclusion criteria and were included in the analyses (4,171 were complete cases) (Fig. 1). Low EtCO<sub>2</sub> (defined as a mean EtCO<sub>2</sub> of < 35 mmHg) occurred in 28% of the patients included. Table 1 displays the characteristics of the study participants. The median EtCO<sub>2</sub> level was 36 mmHg (IQR, 34–39 mmHg) for the entire population, 33 mmHg (IQR, 31–34 mmHg) for patients with low EtCO<sub>2</sub>, and 38 mmHg (IQR, 36–40 mmHg) for patients with normal EtCO<sub>2</sub>.

### Association between low EtCO<sub>2</sub> and postoperative organ dysfunction

Table 2 shows the main results of this study. Postoperative organ dysfunction was observed in 41.67% (498 of 1,195 patients) in the low EtCO<sub>2</sub> group compared with 31.25% (930 of 2,976 patients) in the normal EtCO<sub>2</sub> group. The adjusted risk ratio by multivariate Poisson regression analysis for the low EtCO<sub>2</sub> group (mean EtCO<sub>2</sub> of < 35 mmHg) suggested an association between low EtCO<sub>2</sub> and postoperative organ dysfunction (model 1 adjusted risk ratio, 1.11; 95% confidence interval [CI], 1.03–1.20;  $p = 0.006$ ).

For further analysis, EtCO<sub>2</sub> was divided into quartiles, and the second quartile (mean EtCO<sub>2</sub> of 35–37 mmHg) was used as the reference and as the definition of low EtCO<sub>2</sub> (the lowest quartile of the mean EtCO<sub>2</sub> values [mean EtCO<sub>2</sub> of < 35 mmHg]). Postoperative organ dysfunction decreased gradually from the first to the fourth quartiles (first quartile, 41.67%; second quartile, 36.75%; third quartile, 34.03%; and fourth quartile, 24.10%). The multivariate adjusted risk ratios were 1.08 (95% CI, 0.99–1.19) for the first quartile, 1.01 (95% CI, 0.90–1.12) for the third

quartile, and 0.90 (95% CI, 0.80–1.01) for the fourth quartile, with the second quartile being used as the reference ( $p$  for trend = 0.002) (Table 2).

Regarding the time effect of EtCO<sub>2</sub>, compared with short-term exposure (first quartile of exposure time to EtCO<sub>2</sub> of < 35 mmHg, 0–20 min), long-term exposure to EtCO<sub>2</sub> levels of less than 35 mmHg (the fourth quartile of exposure time to EtCO<sub>2</sub> of < 35 mmHg, 224–1,069 min) was associated with increased postoperative organ dysfunction (model 1 adjusted risk ratio, 1.18; 95% CI, 1.06–1.32;  $p$  = 0.003). Finally, for the cumulative effect of EtCO<sub>2</sub>, the fourth quartile of the area below the EtCO<sub>2</sub> threshold of 35 mmHg (406–6,574 mmHg) was associated with increased organ dysfunction compared with the first quartile (model 1 adjusted risk ratio, 1.13; 95% CI, 1.02–1.26;  $p$  = 0.018).

### **Association between low EtCO<sub>2</sub> and secondary outcomes**

Table 3 shows the relationship between low EtCO<sub>2</sub> and postoperative AKI (model 1 adjusted risk ratio, 1.04; 95% CI, 0.82–1.32;  $p$  = 0.712), postoperative circulatory dysfunction (model 1 adjusted odds ratio, 1.44; 95% CI, 0.79–2.60;  $p$  = 0.229), postoperative respiratory dysfunction (model 1 adjusted odds ratio, 2.19; 95% CI, 1.09–4.39;  $p$  = 0.026), postoperative coagulation dysfunction (model 1 adjusted risk ratio, 1.63; 95% CI, 1.39–1.91;  $p$  < 0.001), and postoperative liver dysfunction (model 1 adjusted risk ratio, 1.10; 95% CI, 0.99–1.21;  $p$  = 0.054). S2–S6 Table show the relationships between the quartiles of EtCO<sub>2</sub> and secondary outcomes and the time and cumulative effects of EtCO<sub>2</sub> on secondary outcomes.

### **Sensitivity analysis**

In a sensitivity analysis, the association between low EtCO<sub>2</sub> and postoperative organ dysfunction was observed even when the study was restricted to patients who had arterial gas measurements during surgery and for whom minute ventilation data were available. Even after adjusting for the

PaCO<sub>2</sub>-EtCO<sub>2</sub> gradient and minute ventilation , low EtCO<sub>2</sub> was associated with increased postoperative organ dysfunction (S7 Table).

## **Discussion**

### **Overview of the results**

In this retrospective cohort study, postoperative organ dysfunction occurred in 41.67% of the patients in the low EtCO<sub>2</sub> group and in 31.25% of the patients in the normal EtCO<sub>2</sub> group. We found that intraoperative EtCO<sub>2</sub> was associated with a 1.11-fold increase in postoperative organ dysfunction.

### **Comparison with previous studies**

Studies on EtCO<sub>2</sub> have focused primarily on patients with CPA and assessed the usefulness of EtCO<sub>2</sub> as a valuable tool that can assess the effectiveness of cardiopulmonary resuscitation (CPR)[6]-[9] and predict the outcome. This is because EtCO<sub>2</sub> correlates well with cardiac output, and no other appropriate noninvasive methods exist to measure this important variable during CPR. Furthermore, although EtCO<sub>2</sub> has been reported to correlate with cardiac output during withdrawal from CPB[10] and can predict volume responsiveness[25], studies have not evaluated the relationship between EtCO<sub>2</sub> and clinical outcomes, and the mechanism of this association is unclear.[10] Some studies have reported that EtCO<sub>2</sub> is associated with increased postoperative mortality[11] and prolonged postoperative length of hospital stay[12] [13], but the cause of death has not been evaluated, and the mechanism is unknown. Furthermore, no studies have focused on the association between intraoperative EtCO<sub>2</sub> and postoperative organ dysfunction in patients undergoing general surgery. In this large retrospective cohort study, we could demonstrate a dose-dependent association between intraoperative EtCO<sub>2</sub> and postoperative organ dysfunction using multivariate Poisson regression analysis in patients undergoing high-risk major abdominal surgeries.

## **Mechanism**

As for the mechanism of the association between intraoperative EtCO<sub>2</sub> and postoperative organ dysfunction, we interpreted that low cardiac output is associated with hypotension and low EtCO<sub>2</sub>, resulting in intraoperative hypoperfusion and postoperative organ dysfunction, when ventilation is constant during surgery. Additionally, even if blood pressure is stabilized by increasing peripheral vascular resistance to compensate for low cardiac output, low EtCO<sub>2</sub> because of low cardiac output is associated with postoperative organ dysfunction, regardless of blood pressure. As an alternative to markers of cardiac output, such as cardiac output from pulmonary artery catheters or noninvasive cardiac output monitors, EtCO<sub>2</sub> levels may provide an objective assessment of cardiac output and organ perfusion status.

## **Clinical implication**

As EtCO<sub>2</sub> is monitored regularly in patients undergoing general anesthesia, it may serve as an early indicator of intraoperative low cardiac output, organ hypoperfusion, and postoperative organ dysfunction. This study showed that even after adjusting for intraoperative blood pressure, EtCO<sub>2</sub> was associated with postoperative organ dysfunction. Intraoperative EtCO<sub>2</sub> values, along with other vital signs, can comprehensively assess a patient's cardiac output and organ perfusion status in terms of ventilation, diffusion, circulation, and metabolism. As a practical clinical implication, EtCO<sub>2</sub> may help make clinical decisions to optimize organ perfusion, such as whether vasoactive drugs should be added because of decreased afterload, inotropes should be added because of decreased preload, or fluids or blood transfusions should be given because of bleeding.

## **Strengths**

This study has several strengths. First, this study investigated not only the dose effect of the mean EtCO<sub>2</sub> level of less than 35 mmHg but also the effect of prolonged exposure to EtCO<sub>2</sub> levels of less than 35 mmHg ( $\geq 224$  min) and the severity of low EtCO<sub>2</sub> exposure (area below the threshold). Second, we adjusted not only for various factors included in the existing AKI risk index, RCRI, and RFRI but also for various confounding factors, such as laparoscopic surgery, type of surgery, intraoperative blood pressure, and ASAPS in four models. Third, there were few missing data, and 99.9% of the cases were complete.

## **Limitations**

This study has several limitations. First, the main analysis of this study did not consider the PaCO<sub>2</sub>-EtCO<sub>2</sub> gap to calibrate EtCO<sub>2</sub> concentrations using PaCO<sub>2</sub> levels. PaCO<sub>2</sub> is usually 2–5 mmHg higher than EtCO<sub>2</sub> in healthy populations. Thus, this study underestimated the effect of low EtCO<sub>2</sub> and overestimated the effect of hypercapnia. However, when restricted to patients with intraoperative arterial gas measurements, low EtCO<sub>2</sub> was associated with increased postoperative organ dysfunction, even when PaCO<sub>2</sub>-EtCO<sub>2</sub> gradient was adjusted. Second, as an unknown confounder, we did not know the potential reasons for anesthesiologists to target a specific EtCO<sub>2</sub> level. Anesthesiologists' interpretation of EtCO<sub>2</sub> may influence their decisions regarding anesthesia management. Third, unmeasured confounding factors, such as smoking history, intraoperative medications, and intraoperative ventilation parameters, may have influenced the association between intraoperative EtCO<sub>2</sub> and postoperative organ dysfunction. For example, hyperventilation is often indicated for patients with intraoperative hyperkalemia, which may lower the level of EtCO<sub>2</sub>, thus probably overestimating the effects of low EtCO<sub>2</sub>. Alternatively, it may underestimate the effects of low EtCO<sub>2</sub> because of the intravenous



administration of sodium bicarbonate in patients with acidosis, thus probably raising the level of EtCO<sub>2</sub>. Fourth, as this was an observation-based study, it does not show causality and could not confirm whether intraoperative management targeting an intraoperative EtCO<sub>2</sub> level of 35 mmHg or higher reduces postoperative organ dysfunction.

## **Conclusion**

In conclusion, in patients undergoing major abdominal surgery, intraoperative low EtCO<sub>2</sub> levels of less than 35 mmHg were associated with increased postoperative organ dysfunction, suggesting that intraoperative EtCO<sub>2</sub> is a predictor of postoperative organ dysfunction.

## Acknowledgements relating to this article

**Assistance with the study:** We are grateful to Mr. Yoshihiro Kinoshita, Ms. Tomoko Hosoya, and Mr. Yohei Taniguchi (Medical Information Systems Section, Management Division, Kyoto University Hospital, Kyoto, Japan) for their assistance in data collection for this study.

## Competing Interests

The authors declare that they have no conflict of interest.

## References

1. Gurgel ST, do Nascimento P, Jr. Maintaining tissue perfusion in high-risk surgical patients: a systematic review of randomized clinical trials. *Anesth Analg*. 2011;112(6):1384-91. Epub 2010/12/16. doi: 10.1213/ANE.0b013e3182055384. PubMed PMID: 21156979.
2. Parker T, Brealey D, Dyson A, Singer M. Optimising organ perfusion in the high-risk surgical and critical care patient: a narrative review. *Br J Anaesth*. 2019;123(2):170-6. Epub 2019/05/06. doi: 10.1016/j.bja.2019.03.027. PubMed PMID: 31054772; PubMed Central PMCID: PMC6676242.
3. Merry AF, Cooper JB, Soyannwo O, Wilson IH, Eichhorn JH. International Standards for a Safe Practice of Anesthesia 2010. *Canadian journal of anaesthesia = Journal canadien d'anesthesie*. 2010;57(11):1027-34. Epub 2010/09/21. doi: 10.1007/s12630-010-9381-6. PubMed PMID: 20857254.
4. Isserles SA, Breen PH. Can changes in end-tidal PCO2 measure changes in cardiac output? *Anesth Analg*. 1991;73(6):808-14. Epub 1991/12/01. doi: 10.1213/00000539-199112000-00023. PubMed PMID: 1952183.
5. Shibutani K, Muraoka M, Shirasaki S, Kubal K, Sanchala VT, Gupte P. Do changes in end-tidal PCO2 quantitatively reflect changes in cardiac output? *Anesth Analg*. 1994;79(5):829-33. Epub 1994/11/01. doi: 10.1213/00000539-199411000-00002. PubMed PMID: 7978395.
6. Hubble MW, Van Vleet L, Taylor S, Bachman M, Williams JG, Viperman R, et al. Predictive Utility of End-Tidal Carbon Dioxide on Defibrillation Success in Out-of-Hospital Cardiac Arrest. *Prehospital Emergency Care*. 2020:1-9. doi: 10.1080/10903127.2020.1828518.
7. Wayne MA, Levine RL, Miller CC. Use of end-tidal carbon dioxide to predict outcome in prehospital cardiac arrest. *Ann Emerg Med*. 1995;25(6):762-7. Epub 1995/06/01. doi: 10.1016/s0196-0644(95)70204-0. PubMed PMID: 7755197.
8. Garnett AR, Ornato JP, Gonzalez ER, Johnson EB. End-tidal carbon dioxide monitoring during cardiopulmonary resuscitation. *Jama*. 1987;257(4):512-5. Epub 1987/01/23. PubMed PMID: 3098993.

9. Stine CN, Koch J, Brown LS, Chalak L, Kapadia V, Wyckoff MH. Quantitative end-tidal CO<sub>2</sub> can predict increase in heart rate during infant cardiopulmonary resuscitation. *Heliyon*. 2019;5(6):e01871. doi: <https://doi.org/10.1016/j.heliyon.2019.e01871>.
10. Baraka AS, Aouad MT, Jalbout MI, Kaddoum RN, Khatib MF, Haroun-Bizri ST. End-tidal CO<sub>2</sub> for prediction of cardiac output following weaning from cardiopulmonary bypass. *The journal of extra-corporeal technology*. 2004;36(3):255-7. Epub 2004/11/24. PubMed PMID: 15559744.
11. Dony P, Dramaix M, Boogaerts JG. Hypocapnia measured by end-tidal carbon dioxide tension during anesthesia is associated with increased 30-day mortality rate. *J Clin Anesth*. 2017;36:123-6. Epub 2017/02/12. doi: 10.1016/j.jclinane.2016.10.028. PubMed PMID: 28183549.
12. Wax DB, Lin HM, Hossain S, Porter SB. Intraoperative carbon dioxide management and outcomes. *European journal of anaesthesiology*. 2010;27(9):819-23. Epub 2010/07/09. doi: 10.1097/EJA.0b013e32833cca07. PubMed PMID: 20613537.
13. Park J-H, Lee H-M, Kang CM, Kim KS, Jang CH, Hwang HK, et al. Correlation of Intraoperative End-Tidal Carbon Dioxide Concentration on Postoperative Hospital Stay in Patients Undergoing Pylorus-Preserving Pancreaticoduodenectomy. *World Journal of Surgery*. 2021. doi: 10.1007/s00268-021-05984-x.
14. Mizota T, Dong L, Takeda C, Shiraki A, Matsukawa S, Shimizu S, et al. Invasive Respiratory or Vasopressor Support and/or Death as a Proposed Composite Outcome Measure for Perioperative Care Research. *Anesth Analg*. 2019;129(3):679-85. Epub 2019/08/20. doi: 10.1213/ane.0000000000003921. PubMed PMID: 31425207.
15. Mizota T, Dong L, Takeda C, Shiraki A, Matsukawa S, Shimizu S, et al. Transient acute kidney injury after major abdominal surgery increases chronic kidney disease risk and 1-year mortality. *J Crit Care*. 2019;50:17-22. Epub 2018/11/24. doi: 10.1016/j.jcrc.2018.11.008. PubMed PMID: 30469043.
16. Way M, Hill GE. Intraoperative end-tidal carbon dioxide concentrations: what is the target? *Anesthesiol Res Pract*. 2011;2011:271539. Epub 2011/11/24. doi: 10.1155/2011/271539. PubMed PMID: 22110496; PubMed Central PMCID: PMC3202118.
17. Futier E, Lefrant JY, Guinot PG, Godet T, Lorne E, Cuvillon P, et al. Effect of Individualized vs Standard Blood Pressure Management Strategies on Postoperative Organ Dysfunction Among High-Risk Patients Undergoing Major Surgery: A Randomized Clinical Trial. *Jama*. 2017;318(14):1346-57. Epub 2017/10/04. doi: 10.1001/jama.2017.14172. PubMed PMID: 28973220; PubMed Central PMCID: PMC5710560  
Form for Disclosure of Potential Conflicts of Interest. Dr Futier reported receiving consulting fees from Edwards Lifesciences and Dräger; lecture fees from Dräger, GE Healthcare, Fresenius Kabi, and Fisher and Paykel Healthcare; and travel reimbursement from Fisher and Paykel Healthcare. Dr Leone reported receiving personal fees from LFB and Augettant and nonfinancial support from MSD. Dr Julia reported being an inventor on a patent owned by Aguettant. Dr Bazin reported receiving honoraria for expertise from General Electric, Ambu, and MSD and a grant from General Electric. No other disclosures were reported.
18. Khwaja A. KDIGO Clinical Practice Guidelines for Acute Kidney Injury. *Nephron Clinical Practice*. 2012;120(4):c179-c84. doi: 10.1159/000339789.
19. Vincent JL, Moreno R, Takala J, Willatts S, De Mendonça A, Bruining H, et al. The SOFA (Sepsis-related Organ Failure Assessment) score to describe organ dysfunction/failure. *Intensive Care Med*. 1996;22(7):707-10. doi: 10.1007/BF01709751.

20. Zou G. A modified poisson regression approach to prospective studies with binary data. *Am J Epidemiol.* 2004;159(7):702-6. Epub 2004/03/23. doi: 10.1093/aje/kwh090. PubMed PMID: 15033648.
21. Kheterpal S, Tremper KK, Heung M, Rosenberg AL, Englesbe M, Shanks AM, et al. Development and validation of an acute kidney injury risk index for patients undergoing general surgery: results from a national data set. *Anesthesiology.* 2009;110(3):505-15. Epub 2009/02/13. doi: 10.1097/ALN.0b013e3181979440. PubMed PMID: 19212261.
22. Lee TH, Marcantonio ER, Mangione CM, Thomas EJ, Polanczyk CA, Cook EF, et al. Derivation and prospective validation of a simple index for prediction of cardiac risk of major noncardiac surgery. *Circulation.* 1999;100(10):1043-9. Epub 1999/09/08. doi: 10.1161/01.cir.100.10.1043. PubMed PMID: 10477528.
23. Arozullah AM, Daley J, Henderson WG, Khuri SF. Multifactorial risk index for predicting postoperative respiratory failure in men after major noncardiac surgery. The National Veterans Administration Surgical Quality Improvement Program. *Ann Surg.* 2000;232(2):242-53. Epub 2000/07/21. doi: 10.1097/00000658-200008000-00015. PubMed PMID: 10903604; PubMed Central PMCID: PMCPMC1421137.
24. Akkermans A, van Waes JAR, Thompson A, Shanks A, Peelen LM, Aziz MF, et al. An observational study of end-tidal carbon dioxide trends in general anesthesia. *Canadian journal of anaesthesia = Journal canadien d'anesthesie.* 2019;66(2):149-60. Epub 2018/11/16. doi: 10.1007/s12630-018-1249-1. PubMed PMID: 30430440; PubMed Central PMCID: PMCPMC6331507.
25. Taggu A. Can Passive Leg Raising (PLR) Test Induced End-Tidal Carbon Dioxide (ETCO<sub>2</sub>) Changes Predict Fluid Responsiveness in Mechanically Ventilated Patients? *CHEST.* 2015;148(4):310A. doi: 10.1378/chest.2259215.

**Table 1.** Patients' characteristics (n = 4,171).

| <b>Characteristics</b>               | <b>All patients<br/>(n = 4,171)</b> | <b>Low EtCO<sub>2</sub><br/>(n = 1,195)</b> | <b>Normal EtCO<sub>2</sub><br/>(n = 2,976)</b> |
|--------------------------------------|-------------------------------------|---------------------------------------------|------------------------------------------------|
| Age, years                           | 66 (56–74)                          | 68 (57–75)                                  | 65 (56–73)                                     |
| Male gender                          | 2551 (61.16%)                       | 702 (58.74%)                                | 1849 (62.13%)                                  |
| <b>ASAPS</b>                         |                                     |                                             |                                                |
| I                                    | 1181 (28.31%)                       | 300 (25.10%)                                | 881 (29.60%)                                   |
| II                                   | 2727 (65.38%)                       | 792 (66.28%)                                | 1935 (65.02%)                                  |
| III                                  | 256 (6.14%)                         | 99 (8.28%)                                  | 157 (5.28%)                                    |
| IV                                   | 7 (0.17%)                           | 4 (0.33%)                                   | 3 (0.10%)                                      |
| BMI, kg.m <sup>-2</sup>              | 22 (20–24)                          | 22 (20–24)                                  | 22 (19–24)                                     |
| COPD                                 | 391 (9.37%)                         | 130 (10.88%)                                | 261 (8.77%)                                    |
| Albumin level < 30 g.l <sup>-1</sup> | 206 (4.94%)                         | 70 (5.86%)                                  | 136 (4.57%)                                    |
| <b>Type of surgery</b>               |                                     |                                             |                                                |
| Colorectal                           | 1297 (31.10%)                       | 350 (29.29%)                                | 947 (31.82%)                                   |
| Liver                                | 1202 (28.82%)                       | 434 (36.32%)                                | 768 (25.81%)                                   |
| Gastric                              | 779 (18.68%)                        | 140 (11.72%)                                | 639 (21.47%)                                   |
| Pancreatic                           | 615 (14.74%)                        | 214 (17.91%)                                | 401 (13.47%)                                   |
| Esophageal                           | 253 (6.07%)                         | 50 (4.18%)                                  | 203 (6.82%)                                    |
| Complex                              | 25 (0.60%)                          | 7 (0.59%)                                   | 18 (0.60%)                                     |
| Laparoscopic surgery                 | 2529 (60.63%)                       | 552 (46.19%)                                | 1977 (66.43%)                                  |
| Emergency surgery                    | 36 (0.86%)                          | 15 (1.26%)                                  | 21 (0.71%)                                     |
| Epidural anesthesia                  | 1479 (35.46%)                       | 503 (42.09%)                                | 976 (32.80%)                                   |
| Duration of surgery, hours           | 5.88 (4.31–7.88)                    | 6 (4.45–7.98)                               | 5.85 (4.28–7.81)                               |
| MAP, mmHg                            | 74 (69–80)                          | 73 (68–79)                                  | 74 (69–80)                                     |
| Blood loss, ml                       | 125 (24–460)                        | 260 (50–669)                                | 95 (20–365)                                    |
| Transfusion volume, ml               | 0 (0–0)                             | 0 (0–0)                                     | 0 (0–0)                                        |
| Infusion volume, ml                  | 3070 (2100–4330)                    | 3430 (2340–4700)                            | 2900 (2050–4200)                               |
| Charlson Comorbidity Index           | 4 (2–5)                             | 4 (2–6)                                     | 3 (2–5)                                        |
| Mean RR, rpm                         | 11 (10–12)                          | 10 (10–12)                                  | 11 (10–12)                                     |

|                           |            |            |            |
|---------------------------|------------|------------|------------|
| Mean FiO <sub>2</sub> , % | 41 (35–45) | 41 (36–45) | 41 (35–45) |
| Mean BIS                  | 44 (40–50) | 44 (39–49) | 44 (40–50) |
| Mean EtCO <sub>2</sub>    | 36 (34–39) | 33 (31–34) | 38 (36–40) |
| Minimum EtCO <sub>2</sub> | 30 (28–33) | 27 (25–29) | 32 (29–33) |
| Maximum EtCO <sub>2</sub> | 43 (40–46) | 38 (36–40) | 44 (42–48) |

Values are given as the median (interquartile range) or count (%).

Abbreviations: ASAPS, American Society of Anesthesiologists Physical Status; BMI, body mass index; COPD, chronic obstructive pulmonary disease; MAP, mean arterial pressure; RR, respiratory rate; FiO<sub>2</sub>, fraction of inspiratory oxygen; BIS, bispectral index; EtCO<sub>2</sub>, end-tidal carbon dioxide.

**Table 2.** Multivariate analysis of the relationship between EtCO<sub>2</sub> and organ dysfunction.

|                                                             | <b>Organ dysfunction (%)</b> | <b>Crude RR (95% CI)</b> | <b>P-value</b> | <b>Adjusted RR (95% CI) Model 1‡</b> | <b>P-value</b> | <b>P for trend</b> |
|-------------------------------------------------------------|------------------------------|--------------------------|----------------|--------------------------------------|----------------|--------------------|
| <b>Mean EtCO<sub>2</sub></b>                                |                              |                          |                |                                      |                |                    |
| Low EtCO <sub>2</sub>                                       | 498/1195 (41.67%)            | 1.33 (1.22–1.45)         | <0.001         | 1.11 (1.03–1.20)                     | 0.006          |                    |
| Normal EtCO <sub>2</sub>                                    | 930/2976 (31.25%)            | 1                        | –              | 1                                    | –              |                    |
| <b>Mean EtCO<sub>2</sub></b>                                |                              |                          |                |                                      |                | 0.002              |
| <35 mmHg                                                    | 498/1195 (41.67%)            | 1.13 (1.02–1.25)         | 0.019          | 1.08 (0.99–1.19)                     | 0.071          |                    |
| 35–37 mmHg                                                  | 369/1004 (36.75%)            | 1                        | –              | 1                                    | –              |                    |
| 37–39 mmHg                                                  | 294/864 (34.03%)             | 0.92 (0.81–1.04)         | 0.221          | 1.01 (0.90–1.12)                     | 0.830          |                    |
| ≥39 mmHg                                                    | 267/1108 (24.10%)            | 0.65 (0.57–0.74)         | <0.001         | 0.90 (0.80–1.01)                     | 0.097          |                    |
| <b>Minutes below EtCO<sub>2</sub> 35 mmHg</b>               |                              |                          |                |                                      |                | 0.003              |
| Quartile value 1 (0–20 min)                                 | 275/1,059 (25.97%)           | 1                        | –              | 1                                    | –              |                    |
| Quartile value 2 (21–93 min)                                | 297/1,063 (27.94%)           | 1.07 (0.93–1.23)         | 0.306          | 1.09 (0.96–1.23)                     | 0.166          |                    |
| Quartile value 3 (94–223 min)                               | 331/1,038 (31.89%)           | 1.22 (1.07–1.40)         | 0.003          | 1.02 (0.90–1.15)                     | 0.746          |                    |
| Quartile value 4 (224–1,069 min)                            | 525/1,011 (51.93%)           | 1.99 (1.77–2.24)         | <0.001         | 1.18 (1.06–1.32)                     | 0.003          |                    |
| <b>Area under the threshold of EtCO<sub>2</sub> 35 mmHg</b> |                              |                          |                |                                      |                | 0.001              |
| Quartile value 1 (0–13 mm.Hg.min <sup>-1</sup> )            | 306/1,048 (29.20%)           | 1                        | –              | 1                                    | –              |                    |
| Quartile value 2 (14–102 mm.Hg.min <sup>-1</sup> )          | 284/1,062 (26.74%)           | 0.91 (0.79–1.05)         | 0.209          | 0.94 (0.83–1.06)                     | 0.369          |                    |



|                                                      |                    |                  |        |                  |       |
|------------------------------------------------------|--------------------|------------------|--------|------------------|-------|
| Quartile value 3 (103–405 mm.Hg.min <sup>-1</sup> )  | 370/1,044 (35.44%) | 1.21 (1.07–1.37) | 0.002  | 1.05 (0.94–1.17) | 0.351 |
| Quartile value 4 (406–6574 mm.Hg.min <sup>-1</sup> ) | 468/1,017 (46.02%) | 1.57 (1.40–1.76) | <0.001 | 1.13 (1.02–1.26) | 0.018 |

Model 1‡: BMI, ASAPS 3 and above, laparoscopic surgery, type of surgery, epidural anesthesia, MAP, age, gender, emergency surgery, diabetes mellitus, congestive heart failure, ascites, hypertension, chronic kidney disease, surgery duration longer than 4 h, ischemic heart disease, cerebrovascular disease, albumin level of less than 30 g.l<sup>-1</sup>, and COPD.

Abbreviations: EtCO<sub>2</sub>, end-tidal carbon dioxide; CI, confidence interval; RR, risk ratio; BMI, body mass index; ASAPS, American Society of Anesthesiologists Physical Status; MAP, mean arterial pressure; COPD, chronic obstructive pulmonary disease.

**Table 3.** Multivariate analysis of the relationship between EtCO<sub>2</sub> and secondary outcomes.

| <b>AKI</b>                         | <b>AKI (%)</b>                         | <b>Crude RR<br/>(95% CI)</b> | <b>P<br/>value</b> | <b>Adjusted RR<br/>(95% CI) Model<br/>1‡</b> | <b>P-<br/>value</b> | <b>Adjusted RR<br/>(95% CI) Model<br/>2§</b> | <b>P-<br/>value</b> |
|------------------------------------|----------------------------------------|------------------------------|--------------------|----------------------------------------------|---------------------|----------------------------------------------|---------------------|
| Low EtCO <sub>2</sub>              | 98/1,195 (8.20%)                       | 1.27 (1.00–1.60)             | 0.044              | 1.04 (0.82–1.32)                             | 0.712               | 1.04 (0.85–1.28)                             | 0.667               |
| Normal EtCO <sub>2</sub>           | 192/2,976 (6.45%)                      | 1                            | –                  | 1                                            | –                   | 1                                            | –                   |
| <b>Circulatory<br/>dysfunction</b> | <b>Circulatory<br/>dysfunction (%)</b> |                              |                    |                                              |                     | <b>Model 3§</b>                              |                     |
| Low EtCO <sub>2</sub>              | 23/1,195 (1.92%)                       | 1.73 (1.02–2.94)             | 0.041              | 1.44 (0.79–2.60)                             | 0.229               | 1.47 (0.82–2.62)                             | 0.187               |
| Normal EtCO <sub>2</sub>           | 33/2,976 (1.11%)                       | 1                            | –                  | 1                                            | –                   | 1                                            | –                   |
| <b>Respiratory<br/>dysfunction</b> | <b>Respiratory<br/>dysfunction (%)</b> |                              |                    |                                              |                     | <b>Model 4§</b>                              |                     |
| Low EtCO <sub>2</sub>              | 16/1,195 (1.34%)                       | 2.49 (1.24–4.96)             | 0.010              | 2.19 (1.09–4.39)                             | 0.026               | 2.18 (1.11–4.31)                             | 0.024               |
| Normal EtCO <sub>2</sub>           | 16/2,976 (0.54%)                       | 1                            | –                  | 1                                            | –                   | 1                                            | –                   |
| <b>Coagulation<br/>dysfunction</b> | <b>Coagulation<br/>dysfunction (%)</b> |                              |                    |                                              |                     |                                              |                     |
| Low EtCO <sub>2</sub>              | 212/1,195 (17.74%)                     | 1.63 (1.39–1.91)             | <0.001             | 1.12 (0.96–1.31)                             | 0.136               |                                              |                     |
| Normal EtCO <sub>2</sub>           | 323/2,976 (10.85%)                     | 1                            | –                  | 1                                            | –                   |                                              |                     |
| <b>Liver dysfunction</b>           | <b>Liver dysfunction<br/>(%)</b>       |                              |                    |                                              |                     |                                              |                     |
| Low EtCO <sub>2</sub>              | 339/1,195 (28.37%)                     | 1.31 (1.17–1.47)             | <0.001             | 1.10 (0.99–1.21)                             | 0.054               |                                              |                     |
| Normal EtCO <sub>2</sub>           | 641/2,976 (21.54%)                     | 1                            | –                  | 1                                            | –                   |                                              |                     |

Model 1‡: BMI, ASAPS 3 and above, laparoscopic surgery, type of surgery, epidural anesthesia, MAP, age, gender, emergency surgery, diabetes mellitus, congestive heart failure, ascites, hypertension, chronic kidney disease, surgery duration longer than 4 h, ischemic heart disease, cerebrovascular disease, albumin level of less than 30 g.l<sup>-1</sup>, and COPD.

Model 2§: age more than 56 years, gender, congestive heart failure, ascites, hypertension, chronic kidney disease, diabetes mellitus, and emergency surgery.

Model 3§: ischemic heart disease, congestive heart failure, cerebrovascular disease, diabetes mellitus, chronic kidney disease, surgery duration longer than 4 hours, emergency surgery, and type of surgery.

Model 4§: age, emergency surgery, albumin level <30 g.l<sup>-1</sup>, blood urea nitrogen level ≥30 mg.dl<sup>-1</sup>, and COPD.

Abbreviations: AKI, acute kidney injury; EtCO<sub>2</sub>, end-tidal carbon dioxide; CI, confidence interval; RR, risk ratio; BMI, body mass index; ASAPS, American Society of Anesthesiologists Physical Status; MAP, mean arterial pressure; COPD, chronic obstructive pulmonary disease.

## **Figure Legend**

**Figure 1.** Flowchart of this study.

We included consecutive patients aged 18 years or older who underwent major abdominal surgery under general anesthesia at Kyoto University Hospital between 2012 and 2017. Then, we extracted the cases that met our eligibility criteria and analyzed them as complete cases.

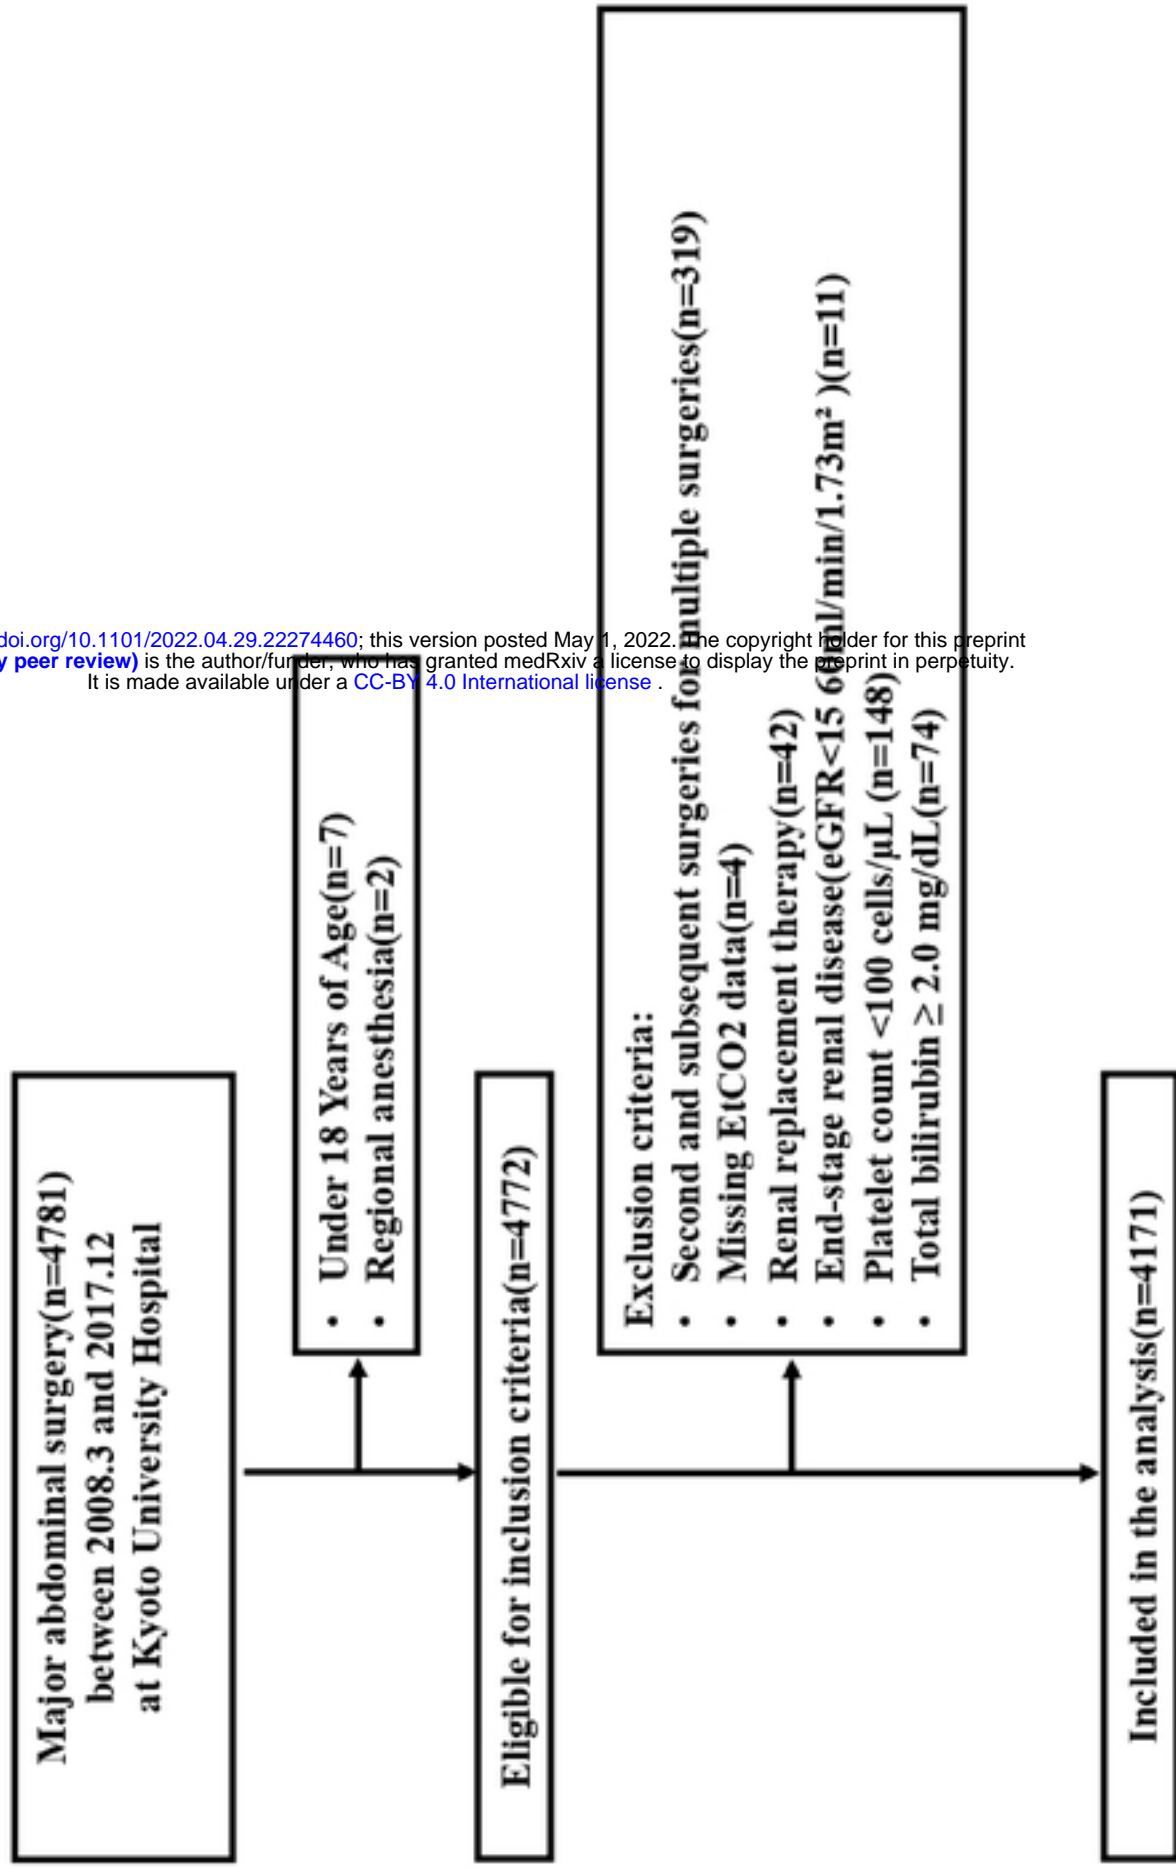

Figure 1. Research flow chart
